# Supplementary material for: Integrated Bioinformatics, Environmental Epidemiologic and Genomic Approaches to Identify Environmental and Molecular Links between Endometriosis and Breast Cancer
Source: MDPI journal article supplement (doi:10.3390/ijms161025285), 2015-10-23
Supplement: s1 [file s1]

# Supplementary Information

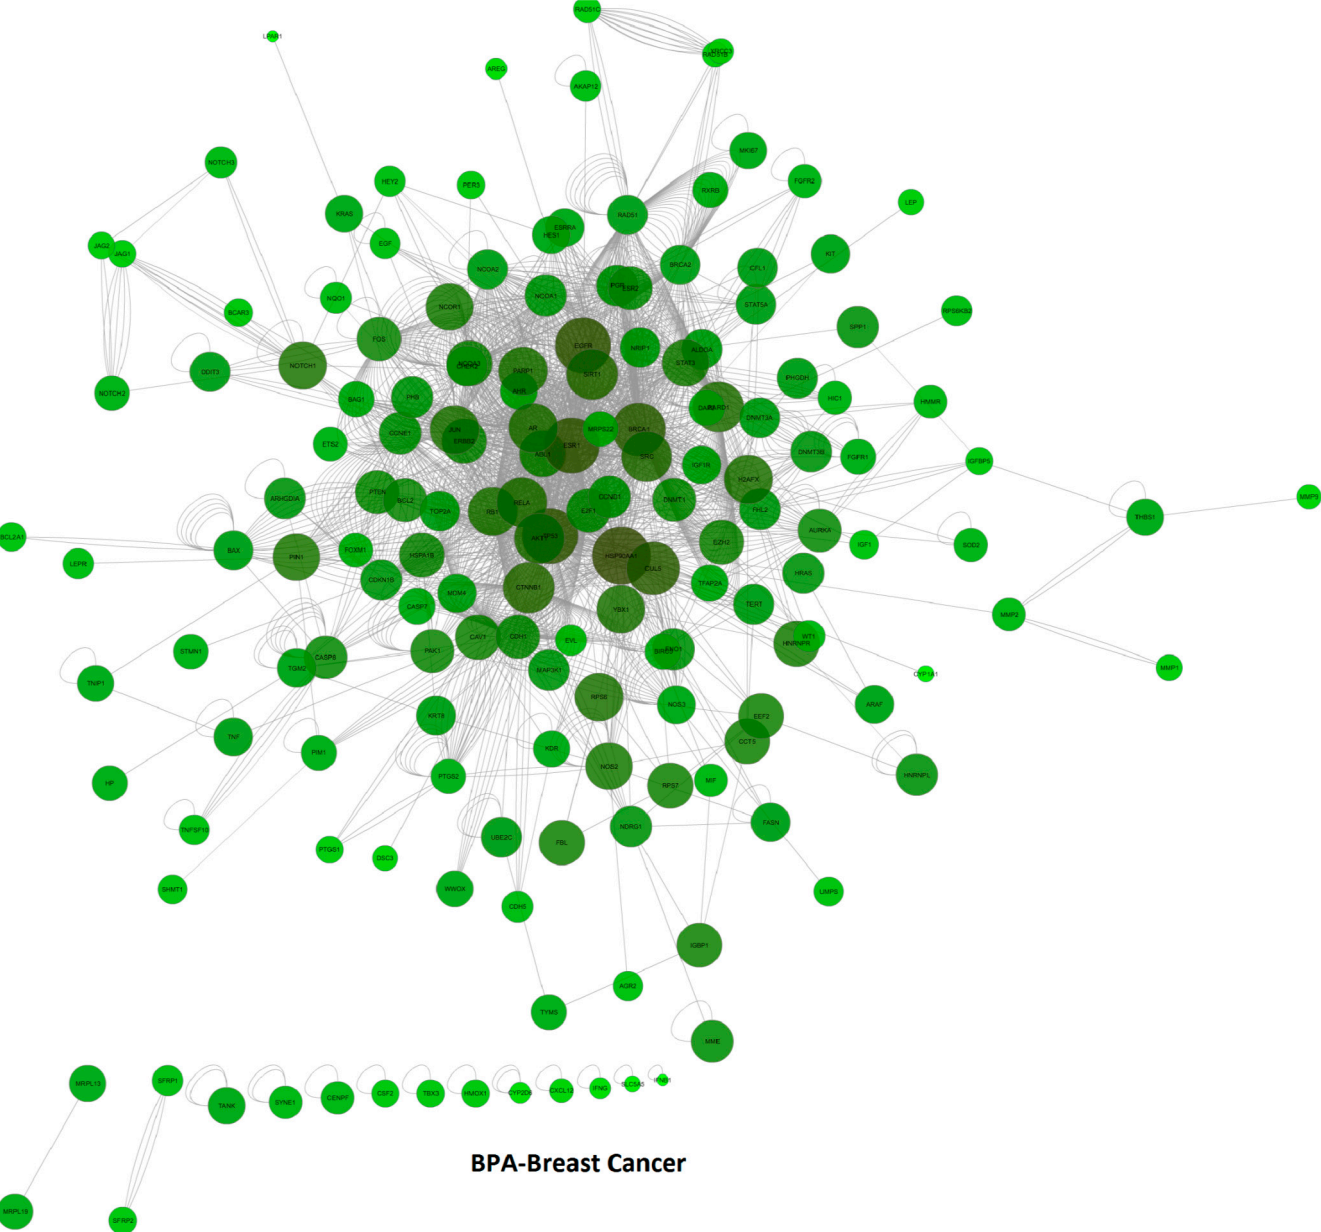

Figure S1. Cont.

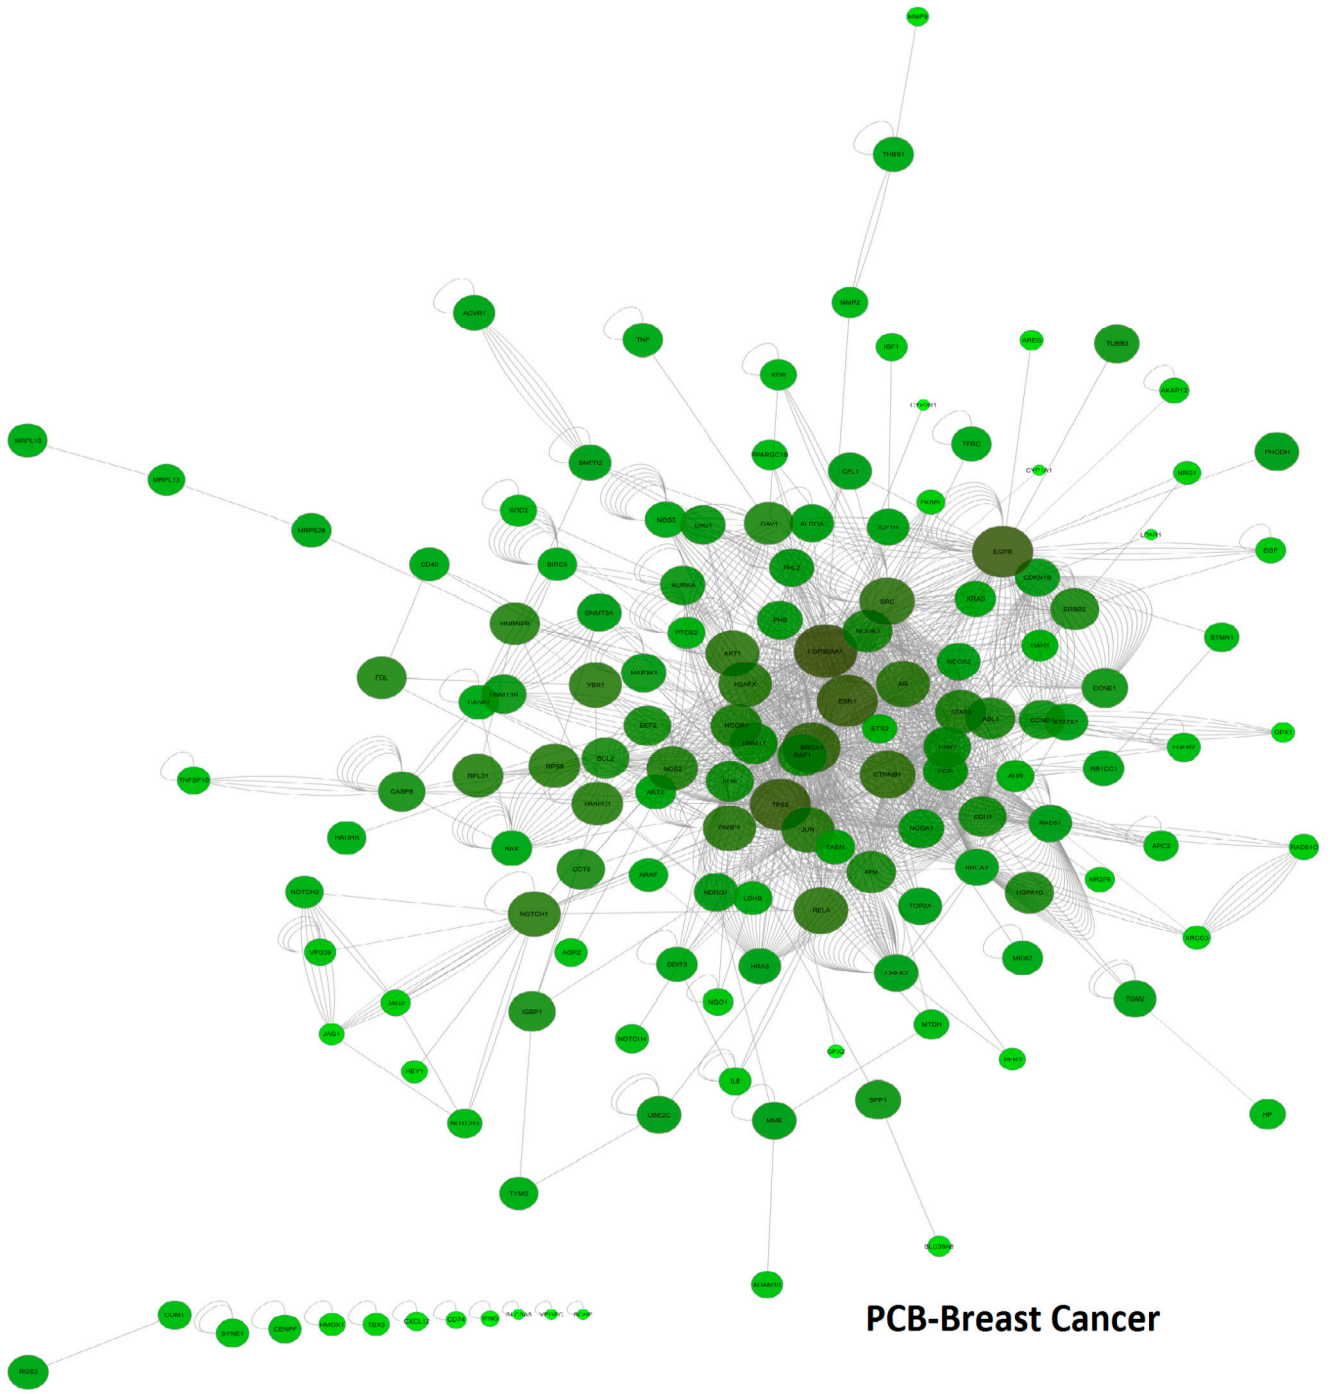

Figure S1. Cont.

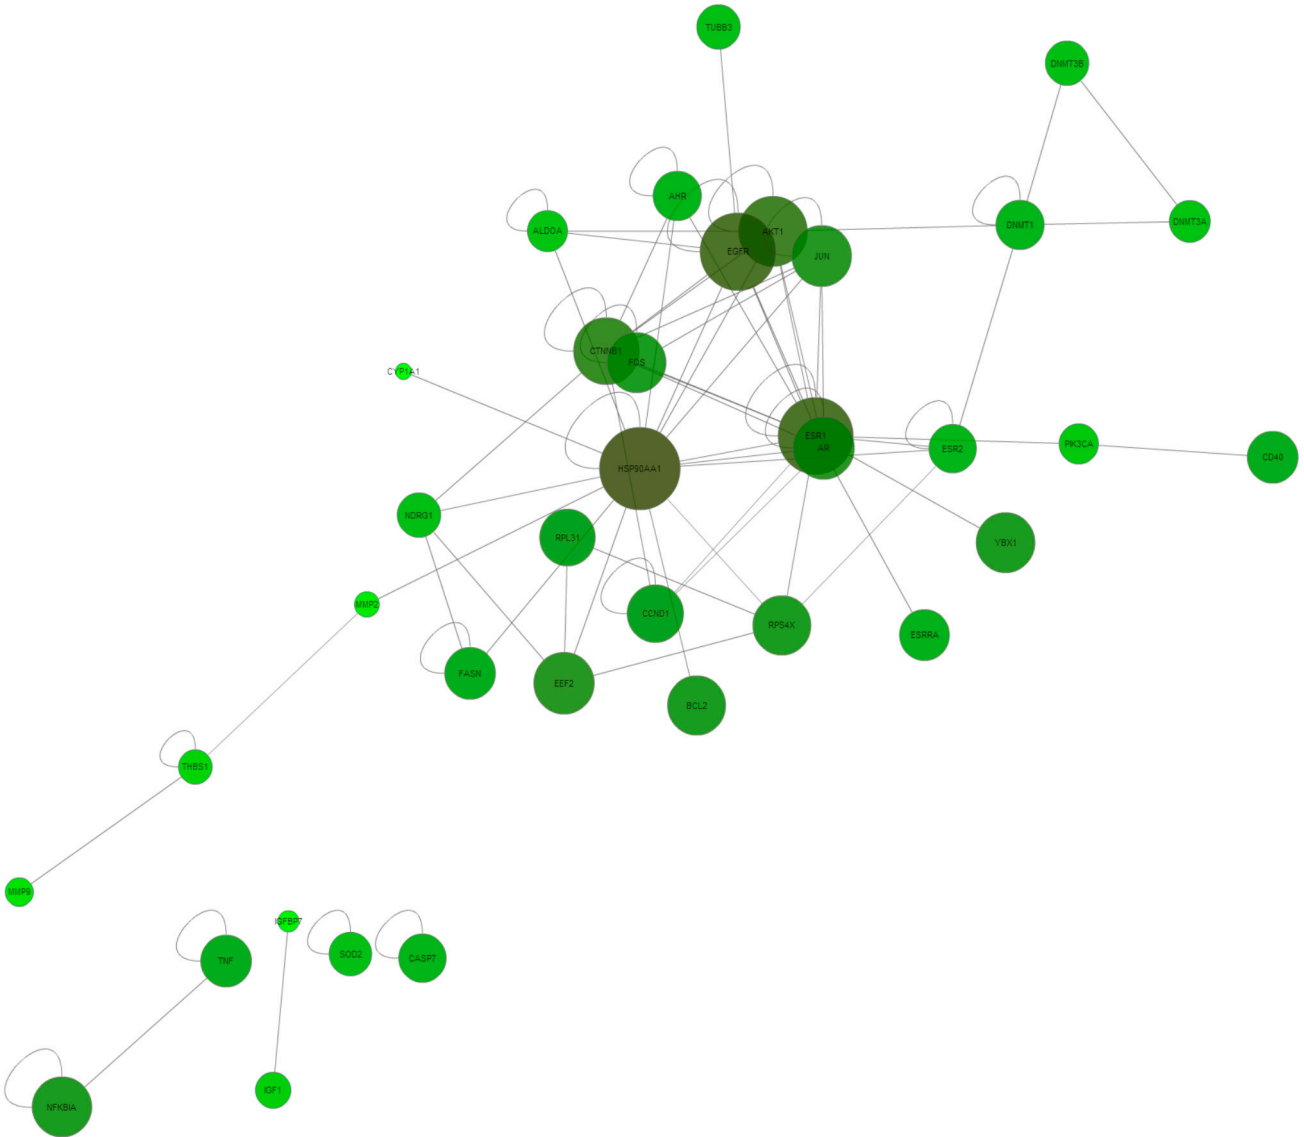

## Phthalate-Breast Cancer

**Figure S1.** Gene Set/Pathway enrichment analysis of genes associated with PCBs, phthalates or bisphenol A in breast neoplasms.

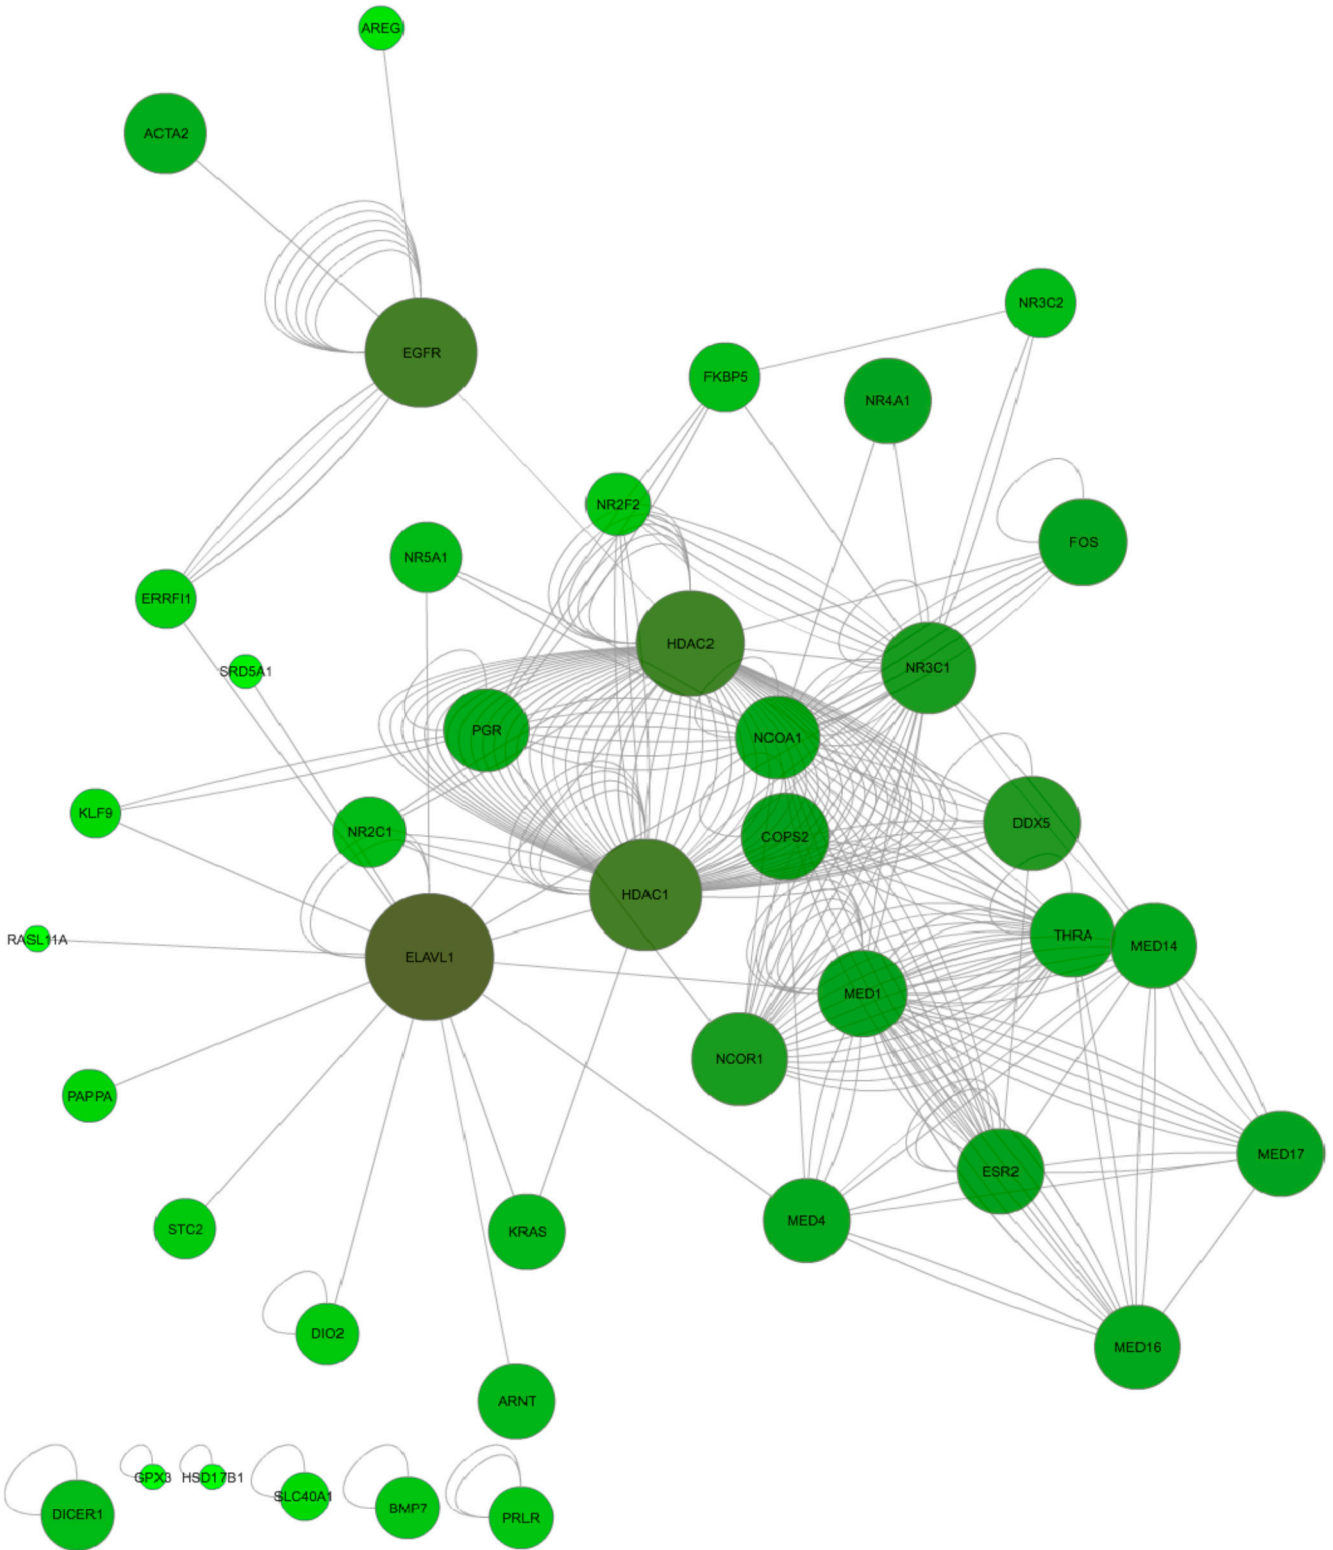

## BPA-Endometriosis

Figure S2. *Cont.*

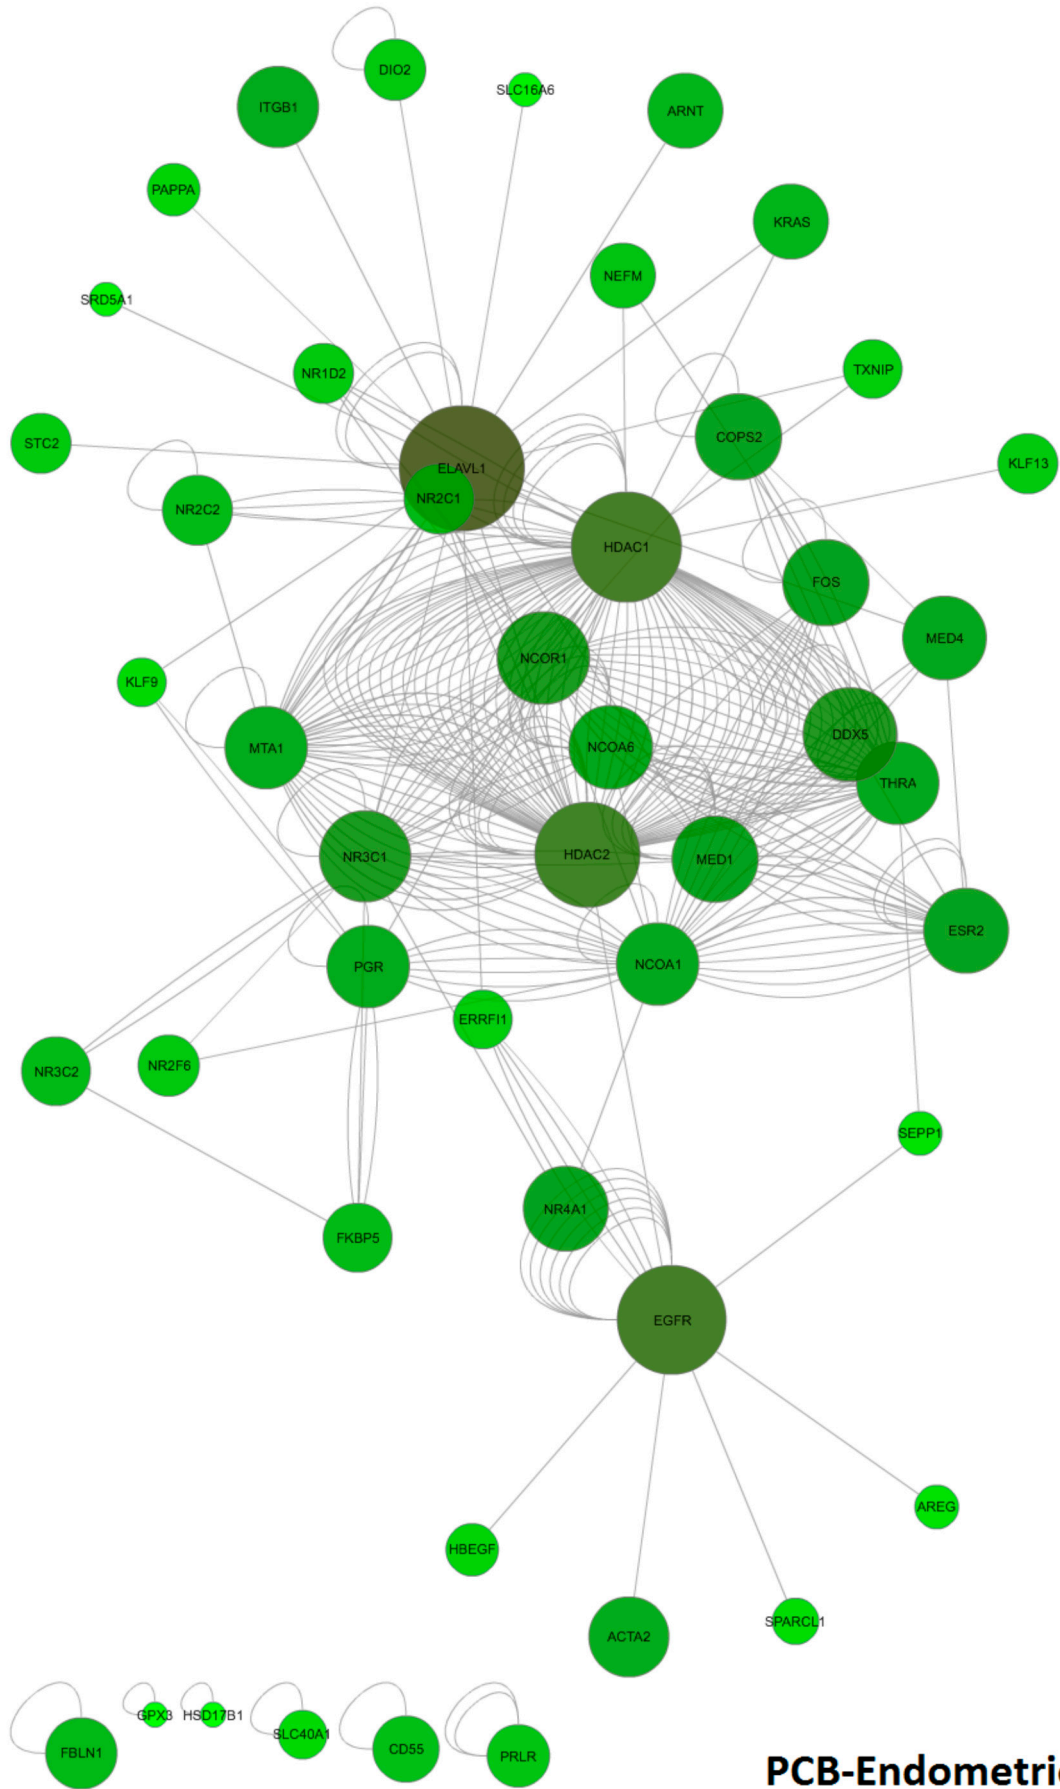

**PCB-Endometriosis**

Figure S2. Cont.

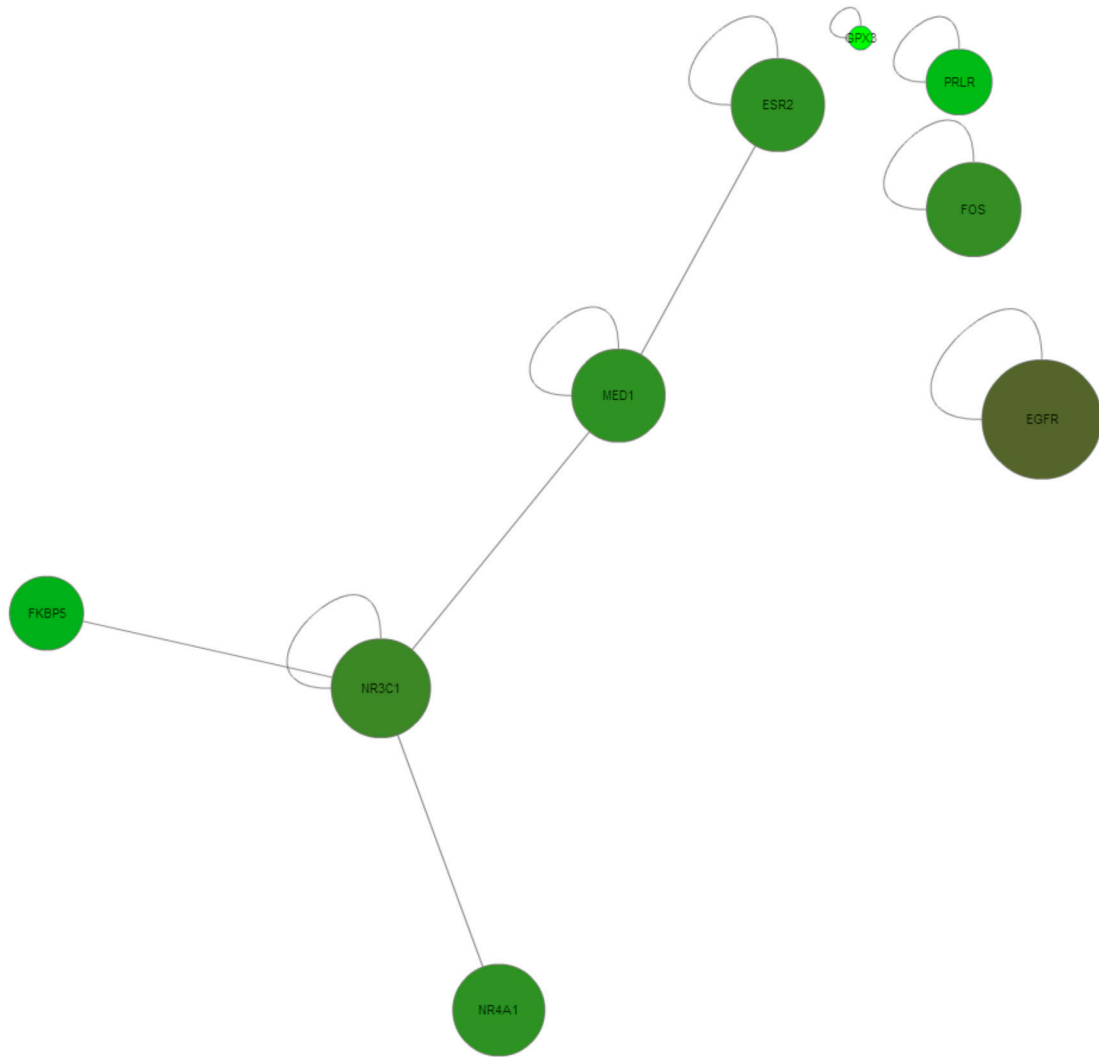

## Phthalate-Endometriosis

**Figure S2.** Gene Set/Pathway enrichment analysis of genes associated with PCBs, phthalates or bisphenol A in endometriosis.
